# Supplementary material
Source: publisher site journal article supplement (http://www.kjim.org/upload/media/kjim-2022-201-Supplementary-Fig-1.pdf)
Supplement: Supplementary file 1 [file kjim-2022-201-Supplementary-Fig-1.pdf]

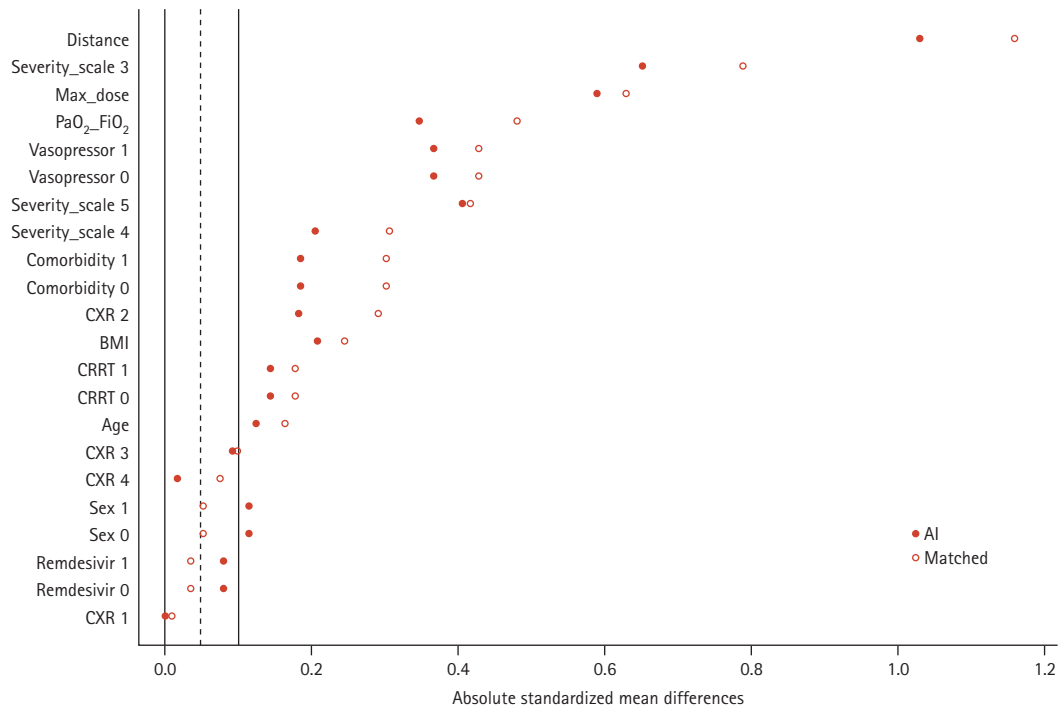

**Supplementary Figure 1.** Absolute standardized mean differences before and after propensity score matching in overall cohort. PaO<sub>2</sub>, partial pressure of oxygen; FiO<sub>2</sub>, fraction of inspired oxygen; CXR, chest X-ray; BMI, body mass index; CRRT, continuous renal replacement therapy.
